# Supplementary material
Source: PubMed Central journal article supplement (PMC9580027)
Supplement: NIHMS1726729-supplement-SOM.pdf [file NIHMS1726729-supplement-SOM.pdf]

## Long Term Exposure to Indoor Air Pollution Risk of Tuberculosis

Vidhiben Patel, MD, MSPH<sup>1</sup> (Vidhiben.Patel@med.miami.edu)

Michael Schweitzer, MD<sup>2</sup>(mdsb87@gmail.com)

Andrew Foster, PhD<sup>3</sup>(andrew\_foster@brown.edu)

Alison Salem, MPH<sup>1</sup>(ars259@med.miami.edu)

Amit Kumar<sup>4</sup> (kumar007\_amit@hotmail.com)

Vineet Kumar<sup>4</sup>(vinni\_2005@yahoo.ca)

Biplab Biswas<sup>5</sup>(biswas.biplab@gmail.com)

Mehdi Mirsaeidi, MD, MPH<sup>1,2</sup>(msm249@med.miami.edu)

Naresh Kumar, PhD<sup>1</sup> (nkumar@miami.edu)

<sup>1</sup> Environmental Health Division, Department of Public Health Sciences, University of Miami Miller School of Medicine - Miami, FL – 33136

<sup>2</sup> Division of Pulmonary, Critical Care, Sleep and Allergy, Department of Medicine, University of Miami, Miller School of Medicine, Miami VA Healthcare System, Miami, FL 33136

<sup>3</sup> Department of Economics, Brown University, Providence, RI 02006

<sup>4</sup> Society for Environmental Health, Narela, Delhi India – 110040

<sup>5</sup> Associate Professor, Burdwan University, West Bengal, India

### Corresponding Authors

Naresh Kumar, PhD  
Environmental Health Division  
Department of Public Health Sciences  
University of Miami  
1120 NW 14<sup>th</sup> St.  
Miami, FL 33136  
Email: [nkumar@miami.edu](mailto:nkumar@miami.edu)  
Tel: (305) 243-4854

### A. Sampling and Survey Strategy

Two rounds of demographic and health surveys were administered in 2004 and 2009 in Delhi and surrounding areas. A location based probabilistic sampling strategy was employed to select households.<sup>(1)</sup> Eicher Street Map of Delhi and satellite data were used to stratify and select the sample sites. Each of the 190 sheets of the Map of Delhi<sup>(2)</sup> were scanned and mosaicked using Spatial Analyst, an extension of ESRI's ArcGIS.<sup>(3)</sup> Using the hue on the street map, residential areas were extracted. A rectangular grid that closely followed the outline (or geographic extent) of each page of the street map was overlaid onto the residential area. A total of 2000 random points, weighted by residential areas as a proxy of sample size, were simulated. The simulated random points were navigated with the aid of a global position system. Of these 2000 random points, 1,576 were accessible households (at/around these random points) and consented to participate in the first round of survey, administered during January through May 2004. As mandated by the Institutional Review Board of Brown University, household address and name of participants were not recorded. However, XY coordinates of the households were recorded

with the aid of global position system (GPS), which has  $\pm 30$  m positional accuracy. Given the coarse resolution of GPS, the same households could not be recruited in 2009.

In 2009, the coordinates of the 1,576 households that were surveyed in 2004 were navigated using GPS, and 1,496 households (94.9% coverage) within 50 m distance of these coordinates were recruited and surveyed. In 2004 and 2009, 3,961 and 2,663 subjects, participated in anthropometric measurements, and of these 3,124 and 2,303 subjects, respectively, aged  $\geq 15$  years and were available at the time of survey, consented to participate in the study. Participants were paid Rupees 100 (US \$1.55) each for their cooperation. The survey data collection for both rounds was approved by Institutional Review Boards of Brown University and University of Iowa (IRB approval #0810992578 and #IRB00000100, respectively). The household locations in both rounds were recorded using GPS, which allowed us to develop contextual information around the households.

Graduate students from Jawaharlal Nehru University (JNU), Delhi and physicians with MBBS (Bachelor of Medicine, Bachelor of Surgery) degree were recruited to administer the survey. Four teams were recruited, and each team consisted a male and a female interviewer, and one physician. All four teams worked simultaneously. All teams were trained to administer the survey, and physicians were trained for anthropometric measurement and lung function testing using MicroDL (hand-held portable) spirometer. A standard protocol and coding system (SPCS) was developed and enforced. All teams participated in a pilot survey to learn and practice how to enforce the SPCS.

The survey was divided into three modules (instrument is available at [\*eph.ccs.miami.edu/Obesity\*](http://eph.ccs.miami.edu/Obesity)<sup>(4)</sup>): household, individual and anthropometric measurement (see Appendix 1 for the survey instrument). The household part covered number of people in the household, household structure, heating and cooking appliances, type of fuel used in cooking, duration, type and location of the residence (e.g. land-use zoning – industrial or residential), morbidity and socio-economic details. The head of the household or a senior member of the household was interviewed for this part. Household module included detailed questions on exposure to solid fuel smoke, such as the use of fuel type for cooking and heating, duration of cooking, time spent in the kitchen in last one week, and usage of exhaust fan. They were also asked whether household had a separate kitchen and appliances used for heating and cooling the home, such as heater, ceiling fan, exhaust fan, air conditioning or cooler.

The individual part included time-activity pattern (i.e. time spent at different places in daily routine), building and place characteristics, residential history over the life course, respiratory health symptoms and smoking habits. The anthropometric part was administered to all available members of the household who were  $\geq 5$  years and consented to participate in the measurements, which included measurement of height and weight along with lung function testing. Weight was measured using a digital scale, and standing height was measured using a stadiometer with a fixed vertical backboard and an adjustable headpiece.

In the section of morbidity and mortality, the respondent who answered the questions about household module, was asked about the current health status of all household members, such as “Did anyone in the household visit health center/hospital or consulted any physician during the last 3 months?” Followed by this other questions were asked to screen for other diseases, including TB. For TB, participants were asked “Has anyone in the household ever suffered from Tuberculosis?” If response was “Yes”, they were asked follow up questions as: “Report age when TB was diagnosed”. To further interrogate TB symptoms, two other questions were asked: “Has anyone in the household ever coughed blood? and “Was anyone’s sputum ever clinically

examined?”. TB cases were identified based on the responses to the above the questions. Questions concerning other risk factors, such as occupation, tobacco smoking and income were also asked. The data related to tobacco smoking was self-reported. In case subject answer ‘YES’ to smoking questions, follow up questions about the types and frequency of smoking were asked.

Individual module also included life time exposure to various type of cooking fuel matrix to assess cooking related exposure. Lifetime cooking matrix included type of fuel used at different ages for example <20, 20 to 30, 30 to 40, 40 to 50, 50 to 60 and > 60 years. Type of fuel was categorized into: 1) solid fuel (coal, coke, dung cake and wood), 2) gas from cylinder (LPG), 3) electric heater, 4) kerosene and 5) others.

**Computation of household expenditure:** Respondent-reported income data can be challenging due to under- and non-reporting of income. Therefore, we utilized household per capital monthly expenditure (in Rupees) for all categories: food items (Rice, Wheat Flour, Pulses, Sugar, Spices etc.), oily food items (vegetable oil, ghee, butter, etc.), milk, vegetables, fruits, meat (including chicken, fish and mutton), toiletries (including soap, combs, hair oil, toothpaste), children’s education, phones (both cellphone and landline), bill of tap water and electricity bill. For some items expenditure was asked on a weekly bases (such as vegetables and fruits), and other monthly (such electricity bill) to reduce recall bias. For example, recalling vegetables and fruits purchased during last week (including today) should have had less recall bias than recalling items purchased asking for items purchased during the past month. For utility bills (such as water and electricity) household receive one monthly bill. Thus, we asked for monthly expenses on such items.

Instead of asking for total expenses household consumption items, respondents were ask the quantity they bought, which was then multiplied by the local market rates, published in Hindustan Times, the National English Newspaper in India. Although there must have been variations in the food items, expenditure on other items must have been constants, such as water, electricity, milk etc. Weekly expenditures were multiplied by 4 in order to estimate monthly expenditure. The sum of total expenditure was divided by the total number of members, who lived in the household at the time of the survey.

**Relationship between income and household expenditure:** Of the total household surveyed during 2004 and 2009, 39% (1,208) households did not report any monthly income or report very low income. However, there was a strong positive relationship ( $R^2 \sim 43\%$ ) between per capita monthly household expenditure and per capita monthly household income of household who reported income under any of the three questions: income for each individuals in the household (I34) from the main occupation, secondary occupation (I47) and others (H24) (Figure S1).

Both variables were highly skewed and analyzed at log scale. A t-test with Welch’s approximation suggests that changes in the rates of per capital monthly household expenditure (0.5162 at natural log scale; or Rupees 799) was not significantly different ( $p \sim 0.19$ ) from the rate of change in the per capital monthly income (0.43 at natural log or Rupee 1,024) between 2004 and 2009 (Table S1).

|                                                                                                                                       |
|---------------------------------------------------------------------------------------------------------------------------------------|
| Table S1: Results of t-test in the rates of change in the monthly per capital household expenditure and income between 2004 and 2009. |
|---------------------------------------------------------------------------------------------------------------------------------------|

| Monthly per capita household    | Mean Difference (2009-2004) | Standard Error | Observation | 95% confidence Interval |
|---------------------------------|-----------------------------|----------------|-------------|-------------------------|
| ln(expenditure (Rupees))        | 0.516                       | 0.023          | 3,063       | 0.47 – 0.56             |
| ln(income (Rupees))             | 0.437                       | 0.055          | 1,862       | 0.33 – 0.55             |
| Difference                      | 0.078                       | 0.060          | -           | -0.38 – 0.196           |
| t-statistics ~ 1.31 (p ~ 0.189) |                             |                |             |                         |

Figure S1: Relationship between self-reported per capita monthly per capital household expenditure and per capita monthly household income.

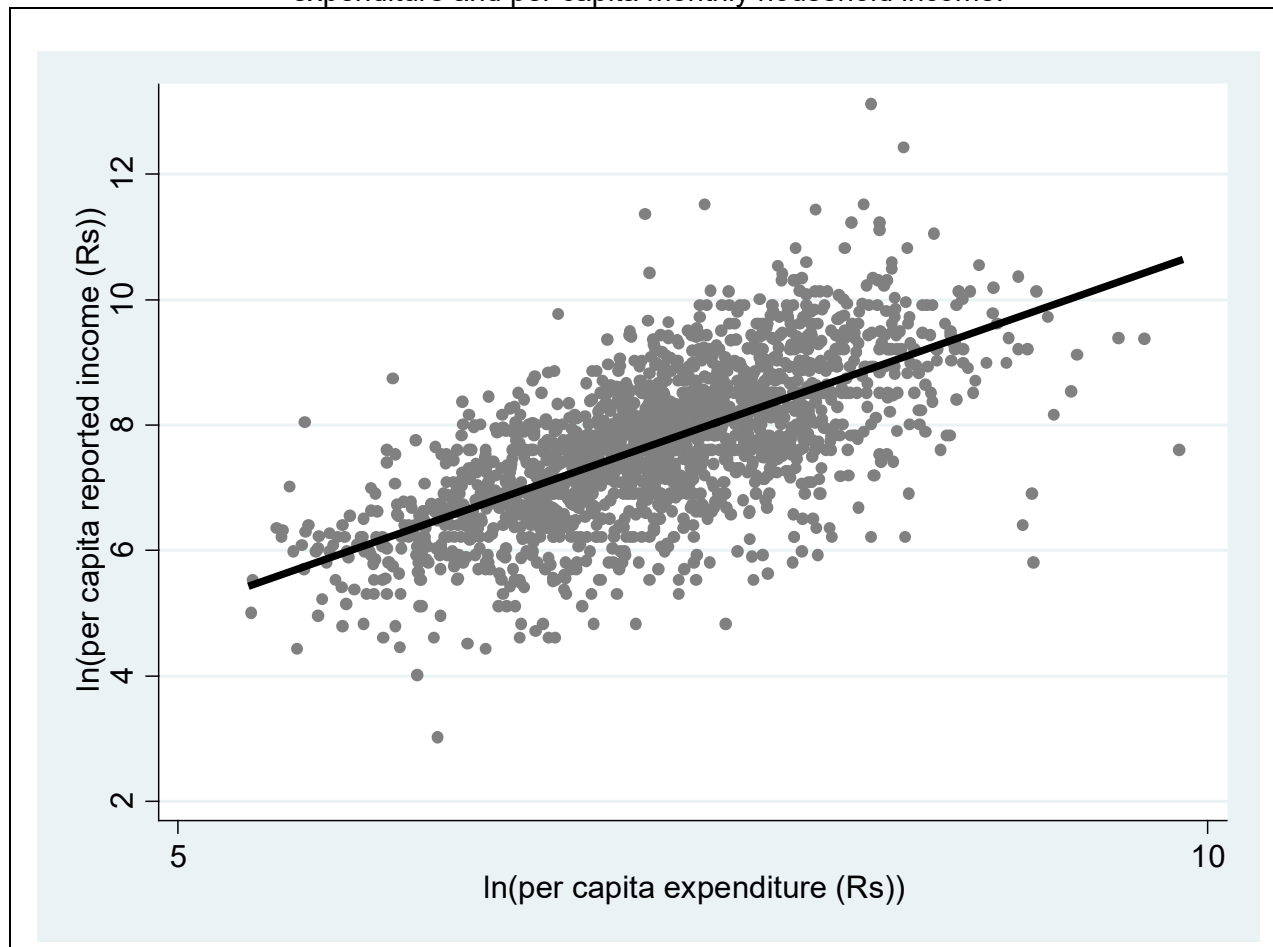

## B. Smoking and Solid Fuel Exposure Interaction

Table S2: Odds of the history of active TB with respect to smoking and solid fuel exposure, and their interaction.

| Variables             | Cooking   |         | Heating   |         |
|-----------------------|-----------|---------|-----------|---------|
|                       | Model - 1 | Model-2 | Model - 1 | Model-2 |
| Smoking (0=no, 1=yes) | 3.176***  |         | 2.328***  |         |

|                                                                                                             |                 |                 |                 |                 |
|-------------------------------------------------------------------------------------------------------------|-----------------|-----------------|-----------------|-----------------|
|                                                                                                             | (1.959 - 5.147) |                 | (1.354 - 4.003) |                 |
| Solid fuel exposure (0=no, 1=yes)                                                                           | 2.238**         |                 | 1.471           |                 |
|                                                                                                             | (1.201 - 4.169) |                 | (0.796 - 2.720) |                 |
| Non-smoker x unexposed                                                                                      | 1               |                 | 1               |                 |
|                                                                                                             | (1.000 - 1.000) |                 | (1.000 - 1.000) |                 |
| Non-smoker x exposed                                                                                        | 1               |                 | 1               |                 |
|                                                                                                             | (1.000 - 1.000) |                 | (1.000 - 1.000) |                 |
| Smoker x unexposed                                                                                          | 1               |                 | 1               |                 |
|                                                                                                             | (1.000 - 1.000) |                 | (1.000 - 1.000) |                 |
| <b>Smoker x exposed</b>                                                                                     | 0.591           | 1.800**         | 2.707*          | 2.291***        |
|                                                                                                             | (0.169 - 2.071) | (1.085 - 2.985) | (0.974 - 7.519) | (1.507 - 3.484) |
| Constant                                                                                                    | 0.012***        |                 | 0.012***        |                 |
|                                                                                                             | (0.009 - 0.015) |                 | (0.010 - 0.016) |                 |
| Observations                                                                                                | 6,623           |                 | 6,600           |                 |
| (robust 95% confidence interval in parenthesis); *** p<0.01, ** p<0.05, * p<0.1                             |                 |                 |                 |                 |
| <b>Model-1</b> included all three terms: smoking, solid fuel exposure and their interaction simultaneously. |                 |                 |                 |                 |
| <b>Model-2</b> included only one term of interaction of solid fuel exposure and smoking.                    |                 |                 |                 |                 |

Figure S2. Predicted probability of the history of active TB using Model 1 (described above) by smoking and exposure status: a. solid fuel for cooking; b. solid fuel used for heating home.

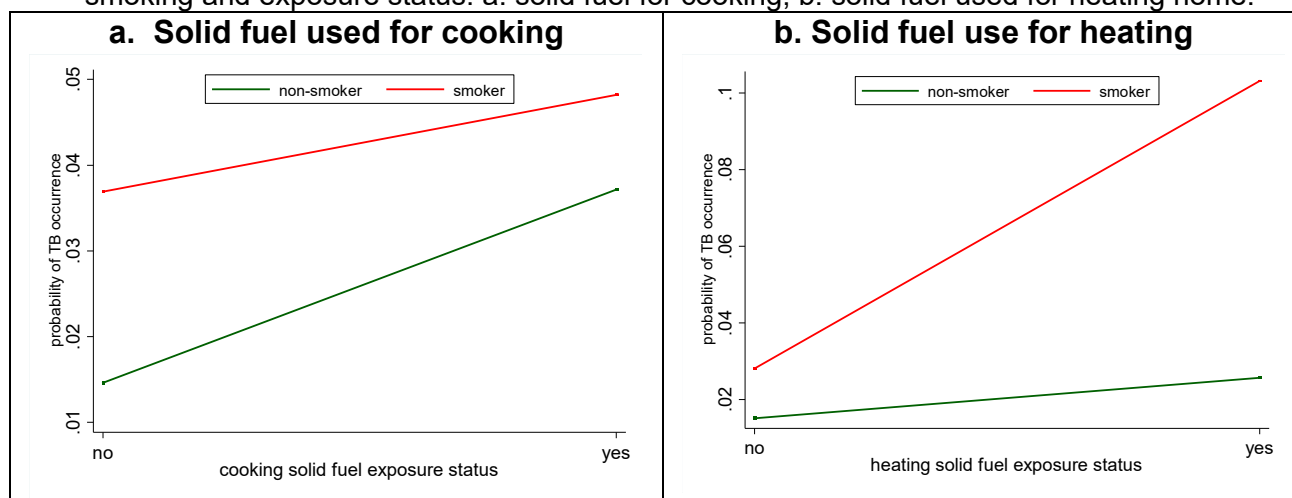

## References

1. Kumar, N., *Spatial sampling design for a demographic and health survey*. Population Research and Policy Review, 2007. **26**(5-6): p. 581-599.
2. EICHER, *Delhi: City Map*. 2010, New Delhi: Eicher Goodearth Ltd.
3. ESRI, *ArcGIS, Version 10.1, Redlands*. 2014, CA: Environmental Systems Research Institute.
4. Sinha, J. and N. Kumar. *Obesity research in Delhi, India*. 2016 [cited 2016 05/08/2016]; Available from: <http://eph.ccs.miami.edu/Obesity>.

H1: Household Code: A104-1 Health and Air Quality Regulation in Delhi, India

H2: Survey Date: 2/2/2008

INTERVIEWER(S) H3: Survey Team ID: A

H4: GPS Code: 117

Address:

H4\_1: Neighborhood Type = 1=Residential, 2=Industrial, 3=Mixed, 4=Commercial, 5=Slum Squatter, 6=Rural Area, 7=Others

H4\_2: Proximity to the main road: 0.35 (km)

INTERVIEWEE: H5: Name of Respondent: Naresh K. H6: Head of Household: Naresh K.

H7: Household Social Group (Caste/Religion): \_\_\_\_\_ (Hindu: 1=Upper Caste, 2=Backward Caste, 3=SC, 4=ST, 5=Muslim, 6=Sikh, 7= Christian, 8=Not Known)

Household members who have been living at this residence for the past 6 months.

| S.No.<br>I1 | Name<br>I2 | Sex (M/F)<br>I3 | Rel. with HOH <sup>1</sup><br>I4 | Age<br>(Years)<br>I5 | Year Since when living at<br>this place<br>I6 | Edu. Level <sup>2</sup><br>I7 | Marital status <sup>3</sup><br>I8 |
|-------------|------------|-----------------|----------------------------------|----------------------|-----------------------------------------------|-------------------------------|-----------------------------------|
| 1           | N. Kumar   | M               |                                  | 38                   | 2006                                          | PG                            | 2                                 |
| 2           | J. Sinha   | F               |                                  | 36                   | 2006                                          | PG                            | 2                                 |
| 3           | NEIL Kumar | M               |                                  | 3                    | 2006                                          | —                             | 1                                 |
| 4           | KUSH Kumar | M               |                                  | 3                    | 2006                                          | —                             | 1                                 |
| 5           |            |                 |                                  |                      |                                               |                               |                                   |
| 6           |            |                 |                                  |                      |                                               |                               |                                   |
| 7           |            |                 |                                  |                      |                                               |                               |                                   |
| 8           |            |                 |                                  |                      |                                               |                               |                                   |
| 9           |            |                 |                                  |                      |                                               |                               |                                   |
| 10          |            |                 |                                  |                      |                                               |                               |                                   |
| 11          |            |                 |                                  |                      |                                               |                               |                                   |
| 12          |            |                 |                                  |                      |                                               |                               |                                   |

<sup>1</sup>Relation with head of household: H=husband, W=wife, F=father, M=mother, S=son, D=daughter, DIL=daughter-in-law, SIL=son-in-law, GS=grand son, GD=grand daughter, SL=Self, O=other  
<sup>2</sup>Education: I=illiterate, L=literate, P=primary, M=middle, MT=matriculation, SS=senior secondary, G=graduate, PG=postgraduate, TE=technical education, OTS=other  
<sup>3</sup>Marital Status: 1=unmarried, 2=married, 3=widow, 4=divorced, 5=separated



H1: Household Code: \_\_\_\_\_

### Health and Air Quality Regulation in Delhi, India

H2: Survey Date: \_\_\_\_\_

#### HOUSEHOLD INFORMATION

H8: Household Type: <sup>1</sup> Single Story <sup>2</sup> Double Story <sup>3</sup> > 2 Stories <sup>4</sup> Slum/Squatter

H9: Household Tenure: 1 = Rented 2 = Owned

H10: Which best describes the building in which you live? TICK ONE BOX ONLY

- a) one family house detached from any other house? 1
- b) one family house attached to one or more houses? 2
- c) a building for two families? 3
- d) a building for three or four families? 4
- e) a building for five or more families? 5
- f) a hut, tent or brick/tent/slum type 6
- g) other: \_\_\_\_\_ 7

H11: Since when you have been living here 2006 (year)

H12: Monthly rent for rented household/government quarters: 10,000-00 (Rs). If owned print approximate rental value.

H13: How many times have you changed your home in the last 10 years? 4

H14: Number of rooms in the household including living room: 8 H15: Are there windows in the household for ventilation: 1 = Yes 2 = No

If unable to get this info, check in the locality and assign the rent according to the house type and the number of rooms

Does your household have any of the following?

- |                        |                                           |                                     |
|------------------------|-------------------------------------------|-------------------------------------|
| H15_1 Ceiling fan      | 1=Yes <input checked="" type="checkbox"/> | 2=No <input type="checkbox"/>       |
| H15_2 Exhaust fan      | <input checked="" type="checkbox"/>       | <input type="checkbox"/>            |
| H15_3 Air conditioning | <input checked="" type="checkbox"/>       | <input type="checkbox"/>            |
| H15_4 Cooler           | <input checked="" type="checkbox"/>       | <input checked="" type="checkbox"/> |

#### Heating and Cooking

Which of the following appliances do you use for heating the house in winter?

- |                                     |                                     |                               |
|-------------------------------------|-------------------------------------|-------------------------------|
| H16_1: open coal, coke or wood fire | 1=Yes <input type="checkbox"/>      | 2=No <input type="checkbox"/> |
| H16_2: electric heater              | <input checked="" type="checkbox"/> | <input type="checkbox"/>      |
| H16_3: Others                       | <input type="checkbox"/>            | <input type="checkbox"/>      |

H17: Is there a separate kitchen in the household? 1 = Yes 2 = No

If answer is yes, ask H17\_1, otherwise go to question number H18

H17\_1 Is there an exhaust fan in the kitchen? 1 = Yes 2 = No



H1: Household Code: \_\_\_\_\_

Health and Air Quality Regulation in Delhi, India

H2: Survey Date: \_\_\_\_\_

H18: What kind of stove do you *mostly* use for cooking? TICK ONE BOX ONLY

1. coal, coke or wood (solid fuel)?

2. gas (gas from cylinder)

3. electric? main

4. kerosene?

5. microwave secondary

6. other: \_\_\_\_\_

H19: Is there any road/street within a distance of 200 meters from your house? 1= Yes 2= No

If yes, ask question H19\_1 and H19\_2

H19\_1 How often do scooters/motorcycles/cars/three-wheelers pass on the street/road next to/in front of your house? TICK ONE BOX ONLY

a) 1-2 a day

b) 1-2 hour

c) 1-2 every minute

d) 2-4 every minute

e) 4-10 every minute

f) More than 10 every minute

g) Others

1  
2  
3  
4  
5  
6  
7

H19\_2 How often do heavy vehicles (e.g. trucks/buses) pass on the street/road next to/in front of your house?

TICK ONE BOX ONLY

a) 1-2 a day

b) 1-2 hour

c) 1-2 every minute

d) 2-4 every minute

e) 4-10 every minute

f) More than 10 every minute

g) Others

1  
2  
3  
4  
5  
6  
7

Morbidity and Mortality

H20: Has any one in the household visited any health center /hospital/medical or consulted any doctor/physician during the last 3 months?

1= Yes

2= No

IF YES, answer the H20\_1 and I9 through I15 in the morbidity matrix for each patient on the next page.

H20\_1: How many people suffered any illness during the past 3 months? \_\_\_\_\_ (Integer)

H1: Household Code: \_\_\_\_\_

**Health and Air Quality Regulation in Delhi, India**

H2: Survey Date: \_\_\_\_\_

**Morbidity Matrix**

| S. No. as in<br><b>I1</b> | Disease/<br>Symptoms<br><b>I9</b> | Clinic/hospital/health center |                             | No of Visits /<br>Consultations<br><b>I12</b> | Total<br>Expenses<br>(Rs) <b>I13</b> | Out-<br>come*<br><b>I14</b> | No of days could not<br>work or go to<br>school/college due to<br>illness ( <b>I15</b> ) | Remark if<br>any |
|---------------------------|-----------------------------------|-------------------------------|-----------------------------|-----------------------------------------------|--------------------------------------|-----------------------------|------------------------------------------------------------------------------------------|------------------|
|                           |                                   | Govt/Private<br><b>I10</b>    | Distance<br>(km) <b>I11</b> |                                               |                                      |                             |                                                                                          |                  |
| 4                         | Flu                               | Private                       | 5                           | 1                                             | 2000                                 | C                           | 2                                                                                        |                  |
|                           |                                   |                               |                             |                                               |                                      |                             |                                                                                          |                  |
|                           |                                   |                               |                             |                                               |                                      |                             |                                                                                          |                  |
|                           |                                   |                               |                             |                                               |                                      |                             |                                                                                          |                  |
|                           |                                   |                               |                             |                                               |                                      |                             |                                                                                          |                  |

Code for I14: C=Cure, U=Still Under Treatment, N=Not Cured, O=Others

H20\_2: Has anyone in the household ever suffered from Tuberculosis? 1 =  Yes 2 =  No  
 H20\_21 If response is Yes write the I1 \_\_\_\_\_, H20\_22: Age when TB was reported \_\_\_\_\_ (Years)

H20\_6: Has any one in the household ever coughed blood? 1 =  Yes 2 =  No  
 H20\_61 If response is Yes write the I1 \_\_\_\_\_, H20\_62: Age when it happened \_\_\_\_\_ (Years)

H20\_7: Has the sputum of any one in the household ever been clinically examined? 1 =  Yes 2 =  No  
 H20\_71 If response is Yes write the I1 \_\_\_\_\_, H20\_72: Age when it was examined 25 (Years)

H20\_3: Has any child in the household suffered from pneumonia (high fever, rapid breathing and cough) during the past 5 years? 1 =  Yes 2 =  No  
 H20\_31: If Yes write the I1 4 (if more than one separate them by comma)

H20\_4: Has any one in the household suffered from Cataract? 1 =  Yes 2 =  No  
 H20\_41: If response is Yes write I1 \_\_\_\_\_ (if more than one separate them by comma)

H20\_5: Has any one in the household been diagnosed of lung cancer? 1 =  Yes 2 =  No  
 H20\_51: If response is Yes write I1 \_\_\_\_\_ (if more than one separate them by comma)



H1: Household Code: \_\_\_\_\_

**Health and Air Quality Regulation in Delhi, India**

H2: Survey Date: \_\_\_\_\_

H21: Has there been any death in the last one year? 1 =  Yes

2 =  No

NOTE: Ask this question in the last.

If answer is yes, write details in the table

| Relationship with HH<br>H21_1 | Age<br>H21_2 | Death Type<br>H21_3* | If due to Illness, disease symptoms<br>H21_4 |
|-------------------------------|--------------|----------------------|----------------------------------------------|
|                               |              |                      |                                              |
|                               |              |                      |                                              |

Code for H21\_3: 1=Natural, 2=Illness, 3=Accidental, 4=Others

**Travel information**

Has any one in the household traveled at least 1 kilometer/day (for any purpose including social, economic, education or job) during the last 30 days?

IF YES, fill the travel matrix of each individual's travel details

| S No. As in<br>I1 | No of visits in the last 30 days<br>I16 | Place visited (at least more than 1km away from home)<br>I17 | Total Distance Traveled (km) in the last 30 days<br>I18 | Purpose of visit <sup>10</sup><br>I19 | Mode of transport <sup>11</sup><br>I20 | Mask Used<br>1=Yes, 2=No<br>I21 |
|-------------------|-----------------------------------------|--------------------------------------------------------------|---------------------------------------------------------|---------------------------------------|----------------------------------------|---------------------------------|
| 1                 | 6 x 4                                   |                                                              | 6 x 2.3 x 4 x 2                                         | 1                                     | C                                      | 2                               |
| 2                 | 6 x 4                                   |                                                              | 6 x 2.3 x 4 x 2                                         | 1                                     | C                                      | 2                               |
| 3                 | 5 x 4                                   |                                                              | 5 x 2.3 x 4 x 2                                         | 3                                     | C                                      | 2                               |
| 4                 | 5 x 4                                   |                                                              | 5 x 2.3 x 4 x 2                                         | 3                                     | C                                      | 2                               |
|                   |                                         |                                                              |                                                         |                                       |                                        |                                 |
|                   |                                         |                                                              |                                                         |                                       |                                        |                                 |
|                   |                                         |                                                              |                                                         |                                       |                                        |                                 |
|                   |                                         |                                                              |                                                         |                                       |                                        |                                 |
|                   |                                         |                                                              |                                                         |                                       |                                        |                                 |
|                   |                                         |                                                              |                                                         |                                       |                                        |                                 |
|                   |                                         |                                                              |                                                         |                                       |                                        |                                 |
|                   |                                         |                                                              |                                                         |                                       |                                        |                                 |
|                   |                                         |                                                              |                                                         |                                       |                                        |                                 |

<sup>10</sup> 1=Job, 2=Shopping, 3=Attending School/College/University, 4=Social Visit, 5=Business, 6=Others

<sup>11</sup> Mode of transportation: W=Walking, Y=Bicycle, S=Scooter/Motorcycle, R=Rail, B=Bus, C=Car/Jeep/SUV, O=Others



H1: Household Code: \_\_\_\_\_

**Health and Air Quality Regulation in Delhi, India**

H2: Survey Date: \_\_\_\_\_

**Economic Base of the Household**

H22 Which is the main source of income of the household? 1=Govt Job, 2=Private Job in small business, 3=Private Job in LTD or MNC, 4=Small Business such as shop  
4=Large Business (such as big retail or wholesale), 5=Industrialist, 6 = Manual Labor, 7=Others

H23 How many people contribute towards income of household? 2

**Main occupation** description of the persons working at least for the past three months.

| S. No. as in I1 | Employer* I22_A | Occupation I22_B** | Since (year) I23 | Place of work I24 | Distance (km) I25 | Mode of Travel <sup>11</sup> I26 | Daily Traveling Time (Hours) I27 | Daily Travel Expenditure (Rs) I28 | No of Hours at Work Place/Day |             | Is the workplace air conditioned I31 | Income              |                |                  |
|-----------------|-----------------|--------------------|------------------|-------------------|-------------------|----------------------------------|----------------------------------|-----------------------------------|-------------------------------|-------------|--------------------------------------|---------------------|----------------|------------------|
|                 |                 |                    |                  |                   |                   |                                  |                                  |                                   | Inside I29                    | Outside I30 |                                      | No of Work Days I32 | Wage (Rs.) I33 | Monthly (Rs) I34 |
| 1               | G               | 1                  | 1994             |                   |                   |                                  | 0.15                             | 200                               | 6                             | 0           | YES                                  |                     |                | 2000             |
| 2               | G               | 1                  | 2000             |                   |                   |                                  | 0.15                             | 200                               | 8                             | 0           | YES                                  |                     |                | 4000             |
|                 |                 |                    |                  |                   |                   |                                  |                                  |                                   |                               |             |                                      |                     |                |                  |
|                 |                 |                    |                  |                   |                   |                                  |                                  |                                   |                               |             |                                      |                     |                |                  |
|                 |                 |                    |                  |                   |                   |                                  |                                  |                                   |                               |             |                                      |                     |                |                  |

**Code for I22\_A:** \* G=Govt. Job, PS=Private Job in small business, PL=Private Job in LTD or MNC, BS=Own small Business, BL=Own Large Business (such as big retail/wholesale), IND=Own Industry, AG =Landlord/Agriculturist, OTS=Others.

**\*\* Code for I22\_B:**

- 1=Higher Professional (e.g Doctor, engineer, lecturer, lawyer etc.)
- 2=Higher Admin (e.g. business exec, high class Govt. officials)
- 3=Technical and lower professional (nurse, artist, primary teacher, lab tech)
- 4=Clerical (secretary, clerk etc)
- 5=Sales(sales manger, shop owner, shop assistant, insurance agent)
- 6=Service (restaurant owner, policeman, waitress, barber, janitor)
- 13=Going to school, college or University.
- 7=Skilled Worker (foreman, motor mechanic, printer, tailor, electrician)
- 8=Semi-Skilled worker (Bus driver, carpenter, metal worker),
- 9=Unskilled worker(laborer, porter, unskilled factory worker)
- 10=Farm Owner
- 11=Farm Laborer
- 12=Home Duties (not working for pay)

**Subsidiary occupation** description of the persons working at least for the past three months; Use the same codes as above.

| S. No. I1 | Employer* I35_A | Occupation I35_B** | Since (year) I36 | Place of work I37 | Distance (km) I38 | Mode of Travel I39 | Daily Traveling Time (Hours) I40 | Daily Travel Expenditure (Rs) I41 | No of Hours at Work Place/Daily |             | Is the workplace air conditioned I44 | Income              |               |                  |
|-----------|-----------------|--------------------|------------------|-------------------|-------------------|--------------------|----------------------------------|-----------------------------------|---------------------------------|-------------|--------------------------------------|---------------------|---------------|------------------|
|           |                 |                    |                  |                   |                   |                    |                                  |                                   | Inside I42                      | Outside I43 |                                      | No of Work days I45 | Wage (Rs) I46 | Monthly (Rs) I47 |
|           |                 |                    |                  |                   |                   |                    |                                  |                                   |                                 |             |                                      |                     |               |                  |
|           |                 |                    |                  |                   |                   |                    |                                  |                                   |                                 |             |                                      |                     |               |                  |
|           |                 |                    |                  |                   |                   |                    |                                  |                                   |                                 |             |                                      |                     |               |                  |
|           |                 |                    |                  |                   |                   |                    |                                  |                                   |                                 |             |                                      |                     |               |                  |



H1: Household Code: \_\_\_\_\_

## Health and Air Quality Regulation in Delhi, India

H2: Survey Date: \_\_\_\_\_

H24: Income from other sources such as rent, pension etc. 0 (Rs)

### Household Assets:

| Item                              | 0=No, 1= Yes | How Many | Approx Unit Value (Rs.) |
|-----------------------------------|--------------|----------|-------------------------|
| H25_1. Television B&w             | 0            |          |                         |
| H25_2. Television color           | 1            | 3        |                         |
| H25_3. Scooter/Motorcycle         | 0            |          |                         |
| H25_4. 3 Wheeler (auto rikshaw)   | 0            |          |                         |
| H25_5. Car or any other 4 wheeler | 1            | 2        |                         |
| H25_6 Cooler                      | 0            |          |                         |
| H25_7. Air Conditioner            | 1            | 1        |                         |
| H25_8. Residential Property Owned | 0/1          | 1        |                         |
| H25_9. Commercial Property Owned  | 0            | 0        |                         |
| H25_10. Other large assets        | 0            | 0        |                         |

If engaged in business/industry etc. then ask the following

H25\_11: Estimated assets: 0 (Rs)

H25\_12: Number of people working in the business from the household: 0 H25\_13: Number of people employed from outside: 0

H25\_14: Average salary of each person employed from outside: 0 (Rs)



H1: Household Code: \_\_\_\_\_

## Health and Air Quality Regulation in Delhi, India

H2: Survey Date: \_\_\_\_\_

## Expenditure module

| Item                                                                                                  | Monthly/Weekly expenditure (Rs) (if weekly multiply by 4) |
|-------------------------------------------------------------------------------------------------------|-----------------------------------------------------------|
| H26_1: Monthly Expenditure on staple food items – Rice, Wheat Flour, Pulses, Sugar, Spices etc.       | 500 × 4                                                   |
| H26_2: Monthly expenditure on vegetable oil, ghee, butter etc.                                        | 150 × 4                                                   |
| H26_3: Monthly expenditure on milk                                                                    | 20 × 2 × 30                                               |
| H26_4: Weekly expenditure on Vegetables                                                               | 15 × 1 × 30                                               |
| H26_5: Weekly expenditure on fruits                                                                   | 20 × 4 × 4                                                |
| H26_6: Weekly expenditure on Meat (Chicken, Fish, Mutton)                                             | 0                                                         |
| H26_7: Monthly expenditure on Toiletries (soap, combs, hair oil, tooth paste etc.)                    | 300 × 1                                                   |
| H26_8: Monthly expenditure on children's education (tuition fee, office supply and pocket money) etc. | 1400 × 1 × 2                                              |
| H26_9: Month expenditure on all phone lines including cell phone (enquire about the last month bill)  | 1600 × 1                                                  |
| H26_10: Monthly expenditure on tap water supply (enquire about the last month bill)                   | 400 × 1                                                   |
| H26_11: Monthly expenditure on electricity (enquire about the last month bill)                        | 800 × 1                                                   |

H1: Household Code: \_\_\_\_\_

Health and Air Quality Regulation in Delhi, India

H2: Survey Date: \_\_\_\_\_

Respiratory health questionnaire for each individual 15 years or older

S.No. as in I1 in the household questionnaire: 1

Name: Naresh Kumar

Exposure Module: Spatial location module

| 6 to 7 AM |      |      |      | 7 AM to 8 AM |      |      |      | 8 AM to 9.00 AM |      |      |      | 9 AM to 12 Noon |     |     |     | 12 Noon to 4 PM |     |      |     |      |     |      |     |
|-----------|------|------|------|--------------|------|------|------|-----------------|------|------|------|-----------------|-----|-----|-----|-----------------|-----|------|-----|------|-----|------|-----|
| 6.15      | 6.30 | 6.45 | 7.00 | 7.15         | 7.30 | 7.45 | 8.00 | 8.15            | 8.30 | 8.45 | 9.00 | 9               | 10  | 11  | 12  | 1.00            |     | 2.00 |     | 3.00 |     | 4.00 |     |
| I50       | I51  | I52  | I53  | I54          | I55  | I56  | I57  | I58             | I59  | I60  | I61  | I62             | I63 | I64 | I65 | I66             | I67 | I68  | I69 | I70  | I71 | I72  | I73 |

Handwritten annotations below the first table:  
 - IH (Indoor Household) with arrows pointing to I54, I55, I56, I57, I58, I59, I60, I61.  
 - TC (Car/Jeep/SUV) with arrows pointing to I60, I61, I62, I63, I64, I65, I66, I67, I68, I69, I70, I71, I72, I73.  
 - IOACP (Inside Office AC) with arrows pointing to I66, I67, I68, I69, I70, I71, I72, I73.  
 - IH (Indoor Household) with arrows pointing to I70, I71, I72, I73.

| 4 to 5 PM |      |      |      | 5 PM to 6 PM |      |      |      | 6 PM to 7.00 PM |      |      |      | 7 PM to 8 PM |      |      |      | 8 PM to 6 AM |     |       |     |        |     |        |     |
|-----------|------|------|------|--------------|------|------|------|-----------------|------|------|------|--------------|------|------|------|--------------|-----|-------|-----|--------|-----|--------|-----|
| 4.15      | 4.30 | 4.45 | 5.00 | 5.15         | 5.30 | 5.45 | 6.00 | 6.15            | 6.30 | 6.45 | 7.00 | 7.15         | 7.30 | 7.45 | 8.00 | 8-10PM       |     | 10-12 |     | 12-4AM |     | 4-6 AM |     |
| I74       | I75  | I76  | I77  | I78          | I79  | I80  | I81  | I82             | I83  | I84  | I85  | I86          | I87  | I88  | I89  | I90          | I91 | I92   | I93 | I94    | I95 | I96    | I97 |

Location Codes: Note - Write address wherever P is suffixed for indoor and outdoor locations in the space between above two matrices

Indoor

Outdoor

Travel Related

IH=Inside Household  
 IOP=Inside office non AC  
 IOACP=Inside Office AC  
 ISP=Inside others e.g. school, college  
 ISACP=Inside others AC e.g. school, college

OH = Outside Household ± 1km  
 OP = Outdoor other than household e.g. play ground, sitting in a lawn, shopping outdoor.

TW=Walking,  
 TS=Scooter/Motorcycle  
 TB=Bus  
 TO=Others

TY=Bicycle  
 TR=Rail  
 TC=Car/Jeep/SUV

If person moves in-out building use IN\_OUT

I98: Year since when you have been following this schedule? 2005



H1: Household Code: \_\_\_\_\_

## Health and Air Quality Regulation in Delhi, India

H2: Survey Date: \_\_\_\_\_

## Location histories:

| Where did you live before the | Place Name (distance from the present location km)<br>I99 | Place Type<br>I100* | Duration (Years)<br>I101 | Job/Occupation<br>I102** | Did you commute?<br>Yes=1, No=2<br>I103 | If Yes in I103 mode of Commuting***<br>I104 |
|-------------------------------|-----------------------------------------------------------|---------------------|--------------------------|--------------------------|-----------------------------------------|---------------------------------------------|
| A. Present Address            | Delhi                                                     | 1                   | 3                        | 1                        | 1                                       | C                                           |
| B. Before A                   | Delhi (2km)                                               | 1                   | 1                        | 1                        | 1                                       | C                                           |
| C. Before B                   | Delhi (15km)                                              | 1                   | 8                        | 1                        | 2                                       | —                                           |
| D. Before C                   | Rohatek (7.5km)                                           | 2                   | 26                       | 13                       | 1                                       | Y                                           |
| E. Before D                   |                                                           |                     |                          |                          |                                         |                                             |

\* Code for I100: 1=Delhi, 2=Other City, 3=Sub Urban of Delhi, 4=Town, 5=Sub Urban of the Town, 6=Rural Areas, 7=Others

## \*\* Code for I102:

1=Higher Professional (e.g Doctor, engineer, lecturer, lawyer etc.)  
 2=Higher Admin (e.g. business exec, high class Govt. officials)  
 3=Technical and lower professional (nurse, artist, primary teacher, lab tech)  
 4=Clerical (secretary, clerk etc)  
 5=Sales (sales manger, shop owner, shop assistant, insurance agent)  
 6=Service (restaurant owner, policeman, waitress, barber, janitor)  
 13=Going to school, college or University.

7=Skilled Worker (foreman, motor mechanic, printer, tailor, electrician)  
 8=Semi-Skilled worker (Bus driver, carpenter, metal worker),  
 9=Unskilled worker (laborer, porter, unskilled factory worker)  
 10=Farm Owner  
 11=Farm Laborer  
 12=Home Duties (not working for pay)

\*\*\* Code for I104: W=Walking, Y=Bicycle, S=Scooter/Motorcycle, R=Rail, B=Bus, C=Car/Jeep/SUV, O=Others

## Cooking Related Exposure: Life Time Cooking Matrix

| Type of   | When you were (Years) |                  |                  |                  |                  |                      |
|-----------|-----------------------|------------------|------------------|------------------|------------------|----------------------|
|           | < 20 Years<br>I105    | 20 to 30<br>I106 | 30 to 40<br>I107 | 40 to 50<br>I108 | 50 to 60<br>I109 | > 60 years<br>> I110 |
| Fuel Used | 2                     | 2                | 3                |                  |                  |                      |

1=Solid Fuel (Coal, Coke, Dung Cake, Wood), 2=Gas from Cylinder (LPG), 3=Electric Heater, 4=Kerosene, 5=Others

H1: Household Code: \_\_\_\_\_

Health and Air Quality Regulation in Delhi, India

H2: Survey Date: \_\_\_\_\_

I111: How many days a week do you spend more than 15 minutes on cooking (food)? 7 (days)

If answer is not 0, ask question I112 through I116

I112: *On average* how long have you spent cooking with your stove each day in the last one week? 0.5 (Hours)

I113: *Over the last week* when you were cooking did you have a door or window to the outside air open TICK ONE BOX ONLY

- a. most of the time
- b. some of time
- c. rarely (or only occasionally)
- d. I do not have a door or window that opens to the outside in my kitchen

|                                       |
|---------------------------------------|
| 1                                     |
| 2                                     |
| 3                                     |
| <input checked="" type="checkbox"/> 4 |

I114: Do you have an extractor fan over the cooker? 1=Yes, 2=No

I115: When cooking, do you use the fan TICK ONE BOX ONLY

- a) all of the time?
- b) some of the time?
- c) none of the time?
- d) not applicable

|                                       |
|---------------------------------------|
| <input checked="" type="checkbox"/> 1 |
| 2                                     |
| 3                                     |
| 4                                     |

I116: Does the fan take the fumes outside the house? 1= YES 2= NO

I117: How do you describe your smoking habit?

- a. Never Smoked
- b. Smoked at least 100 cigarettes/biris, but has giving up smoking
- c. Smoker, means smoke these days

If response is c. ask question I118\_A and I118\_B

I118\_A What do you smoke? 1=Cigarette 2=Biri 3=Both 4= Hukka

I118\_B How many Cigarette and/or biris (together) do you smoke in a day? \_\_\_\_\_ (Number)

Air Quality Awareness Module

I119 Do think that the air pollution levels are high in your locality or on the roads you travel or at the place you work? 1= YES 2= NO

If answer is yes, ask questions I119\_A through I119\_C.

I119\_A: Who do you think is responsible for high levels of air pollution? vehicles & industries

I119\_B: Do you think that the air pollution levels can be reduced? 1= YES 2= NO



H1: Household Code: \_\_\_\_\_

Health and Air Quality Regulation in Delhi, India

H2: Survey Date: \_\_\_\_\_

I119\_C If answer is Yes, how? Better technology & reduction in the # of vehicles

I120: Do you know if there are any sources of pollution in your neighborhood? 1=  YES 2=  NO

I120\_A: What is the type of air pollution?

1=  Vehicles

2=  Thermal Plant(s)

3=  Cooking

4=  Industry

5=  Others

I120\_B: How far is this pollution source from your house? 0.75 (km)

I121: Do you think the air quality in Delhi has improved after CNG regulation? 1=  YES 2=  NO

I122: Has any industry in your locality/neighborhood shut down during the last two years? 1=  YES 2=  NO

If response to I122 is yes, then ask I122\_A

I122\_A: Why did this shut down? 1= Due to high pollution level, 2= Others DDA regulation

I123: Do you think that the high levels of air pollution have some effect on human health? 1=  YES 2=  NO

If response is Yes, ask I123\_A and I123\_B

I123\_A: What type of disease(s) do you think it can cause? Asthma, lung cancer, heart attack

I123\_B: What can be done to prevent these diseases? Clean air by reducing air pollution

I123\_C: If we assume that the air pollution cause respiratory diseases including flu, eye nose allergies, asthma etc. Like we pay for clean water, would you be willing to pay for the cost of clean air to avoid any of the related diseases? 1=  YES 2=  NO

I123\_D If YES how much can you afford to pay for the clean air like you pay for tap water or electricity?

- 1= Less than Rs. 5
- 2= 5 to 10
- 3= 10 to 20
- 4= 20 to 40
- 5= 40 to 100
- 6= 100 to 250
- 7= 250 to 500
- 8= More than 500
- 9= Yes, but not precise



H1: Household Code: \_\_\_\_\_

Health and Air Quality Regulation in Delhi, India

H2: Survey Date: \_\_\_\_\_

Respiratory Health Module

I124: Have you had wheezing or whistling in your chest at any time in the last 3 months? 1= YES 2= NO

IF 'NO' GO TO QUESTION I125, IF 'YES':

I124\_A: Have you been at all breathless when the wheezing noise was present? 1= YES 2= NO

I124\_B: Have you had this wheezing or whistling when you did not have a cold? 1= YES 2= NO

I125: Have you woken up with a feeling of tightness in your chest at any time in the last 3 months? 1= YES 2= NO

I126: Have you had an attack of shortness of breath that came on during the day when you were at rest at any time in the last 3 months? 1= YES 2= NO

I127: Have you had an attack of shortness of breath that came on following strenuous activity at any time in the last 3 months? 1= YES 2= NO

I129: Have you been woken by an attack of coughing at any time in the last 3 months? 1= YES 2= NO

I130: Do you usually cough first thing in the morning in the winter? 1= YES 2= NO

I131: Do you usually cough during the day, or at night, in the winter? 1= YES 2= NO

If response is yes ask I131\_A and I131\_B

I131\_A: Do you usually bring up any phlegm from your chest first thing in the morning in the winter? 1= YES 2= NO

I131\_B: Do you usually bring up any phlegm from your chest during the day, or at night, in the winter? 1= YES 2= NO

I132: Do you ever have trouble with your breathing? 1= YES 2= NO

IF 'NO' GO TO QUESTION I134, IF 'YES':

TICK ONE BOX ONLY

I132\_A: Do you have this trouble

a) continuously so that your breathing is never quite right?

b) repeatedly, but it always gets completely better?

c) only rarely?

- 1
2
3

I134: Has a doctor ever confirmed that you suffer from Asthma? 1= YES 2= NO

IF 'NO' GO TO QUESTION I135, IF 'YES': 1= YES 2= NO

I134\_A: How old were you when you had your first attack of asthma? YEARS

I134\_B: How old were you when you had your most recent attack of asthma? YEARS

H1: Household Code: \_\_\_\_\_

**Health and Air Quality Regulation in Delhi, India**

H2: Survey Date: \_\_\_\_\_

**I134\_C:** How many attacks of asthma have you had in the last 3 months? \_\_\_\_\_

**I134\_D:** Which months of the year do you usually have attacks of asthma?

1. January / February
2. March / April
3. May June
4. July / August
5. September / October
6. November / December

**I134\_H:** Are you currently taking any medicines including inhalers, aerosols or tablets for asthma?

NO

YES

**I134\_I:** Do you have written instructions from your doctor on how to manage your asthma if it gets worse or if you have an attack?

NO

YES

**I135:** Do you have any nasal allergies? 1=  YES 2=  NO

**IF NO GO TO I136, IF YES**

**I135\_A:** How old were you when you first had nasal allergy? 20 Years

**I136:** Have you ever had a problem with sneezing, or a runny or a blocked nose when you did not have a cold or the flu? 1=  YES 2=  NO

**Allergy Module**

| Does any of the following happen         | When in contact with or near to        |                                                              |                      |                                                          |
|------------------------------------------|----------------------------------------|--------------------------------------------------------------|----------------------|----------------------------------------------------------|
|                                          | Animals-Dog, Cat, Horse<br><b>I137</b> | Dusty part in the house<br>Or pillow or duvet<br><b>I138</b> | Smoke<br><b>I139</b> | Trees, Grass flowers or lots<br>of pollen<br><b>I140</b> |
| A. Start to cough?                       |                                        |                                                              |                      |                                                          |
| B. Start to sneeze or get a running nose |                                        |                                                              |                      |                                                          |
| C. Get itchy or watering eyes            |                                        |                                                              |                      |                                                          |

1=Yes 2=No

**I141:** About how many books were there around your family's house when you were 14/15/16 years of old?

1 = None

5 = Around 100

2 = 1 or 2

6 = Around 200

3 = Around 20

7 = Around 500

4 = Around 50

8 = Around 1000 or More



H1: Household Code: \_\_\_\_\_

Health and Air Quality Regulation in Delhi, India

H2: Survey Date: \_\_\_\_\_

Needed for every individual 5 years or older

Individual ID as in I1 1

Name: Naresh K.

I142: While performing spirometry record MicorDL ID: X

I143: Height: 72" (Inches)

I144: Weight: 80 (kg)

**Spirometry Readings**

| Trial Number | PEF<br>I145A | FEV <sub>1</sub><br>I145_B | FVC<br>I145_C |
|--------------|--------------|----------------------------|---------------|
| 1.           | 672          | 3.56                       | 3.64          |
| 2.           | 680          | 3.84                       | 3.94          |
| 3.           | 630          | 4.01                       | 4.25          |

Best                      680                      4.01                      4.25
